# Supplementary material for: Influence of 1-Hydroxyethylidene-1,1-Diphosphonic Acid on the Soft Tissue-Dissolving and Gelatinolytic Effect of Ultrasonically Activated Sodium Hypochlorite in Simulated Endodontic Environments
Source: MDPI journal article supplement (doi:10.3390/ma14102531), 2021-05-13
Supplement: s1 [file s1]

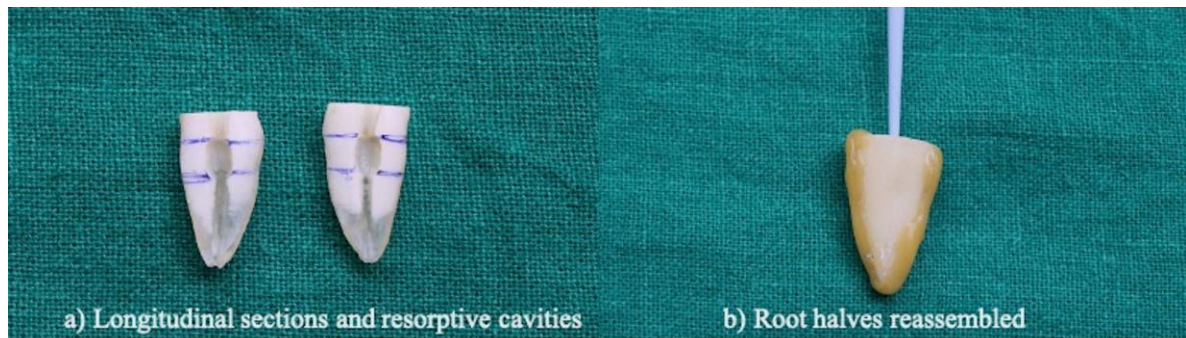

**Figure S1.** (a) Depiction of a longitudinally sectioned root. Semicircular cavities were prepared in the root canal wall in the middle third of each root half using no. 6 round diamond operated at slow speed under water cooling. (b) After placing the pre-weighed soft tissue pieces into the simulated internal resorption cavities, the root halves were reassembled using a light curing resin barrier. Care was exercised to maintain canal patency by placing a F3 ProTaper gutta-percha point between the two root sections. The apex of each root was closed with sticky wax to simulate a closed-end system.
